# Supplementary material for: A Schiff Base-Functionalized Triphenylamine Fluorescent Probe for Selective and Sensitive Detection of Cu2+ in Aqueous Media
Source: Research Square preprint supplement (doi:10.21203/rs.3.rs-8247812/v1), 2025-12-17
Supplement: Supplementary file 1 [file 5873bf77da560c73983b8d85.docx]

**Supplementary Materials**

**A Schiff Base-Functionalized Triphenylamine Fluorescent Probe for Selective and Sensitive Detection of Cu2+ in Aqueous Media**

Long Liua, Jiayi Chena,Meijun Chena, Wen Huanga, Xiang Liaoa, Hanqing Wu*a, Jingshui Xu*a

*a Guangdong Provincial Key Laboratory of Petrochemical Equipment Fault Diagnosis, School of School of Materials Science and Engineering, Guangdong University of Petrochemical Technology, Maoming, Guangdong 525000, China.*

*Phone:+8619042711051*

*Email: [LL0116@gdupt.edu.cn](mailto:2016021884@m.scnu.edu.cn)*

**1. Materials and methods**

All chemical reagents and solvents (analytical grade and spectroscopic grade) used in this study were purchased from commercial sources and used as received without further purification. Fourier transform infrared (FT-IR) spectra were recorded on a Bruker (Germany) SEWERE ALPHA-T spectrometer, with samples prepared as KBr pellets. 1H NMR and 13C NMR spectra were measured on an AVANCE 400 MHz NMR spectrometer. UV-vis absorption spectra were obtained using a Shimadzu UV-2550 spectrophotometer. Fluorescence spectra were recorded on a Hitachi F-4700 fluorescence spectrophotometer (Japan). Mass spectrometry data were acquired using a Waters UPLC/Xevo G2-XS Q-TOF LC/MS spectrometer.

**2. General information**

Ultrapure water was used to prepare stock solutions (1 × 10-3 M) of various metal ions, including Al³⁺, Zn²⁺, Ba²⁺, Ca²⁺, Cd²⁺, Co²⁺, Cr³⁺, Cu²⁺, Fe²⁺, Fe³⁺, Hg²⁺, K⁺, Mg²⁺, Mn²⁺, Na⁺, Pb²⁺, Ni²⁺, and Ag⁺. The stock solution of probe TPA-OPD (1 × 10-³ M) was prepared in DMSO. Prior to measuring UV–vis absorption and fluorescence spectra, this stock solution was diluted into the mixed solvent H₂O/DMSO (95:5, v/v) to yield a final concentration of 10-⁵ M. For fluorescence spectral measurements, the excitation wavelength was set at 370 nm, and both excitation and emission slit widths were fixed at 10 nm.


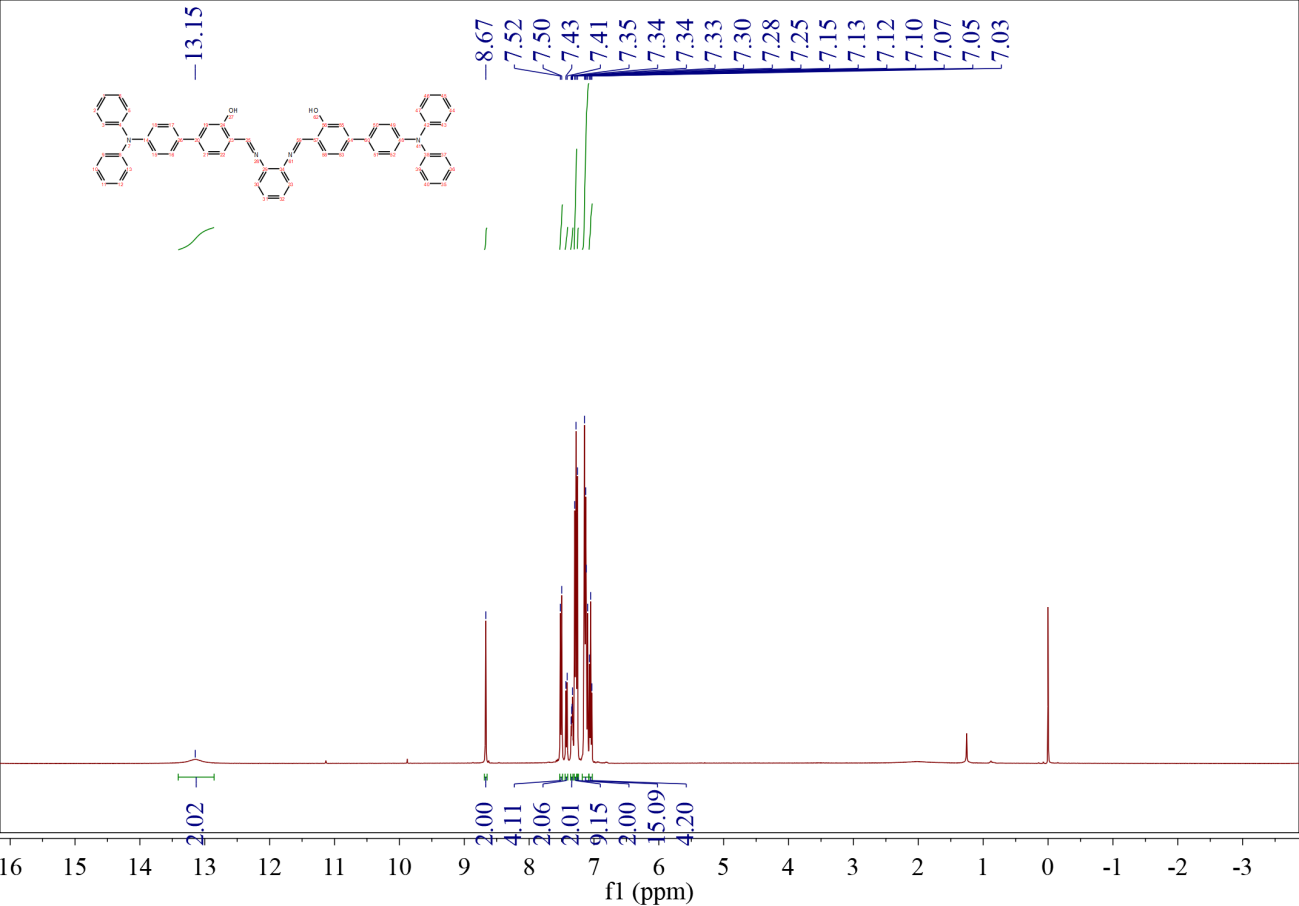


Fig. S1 1H NMR of compound **TPA-OPD**


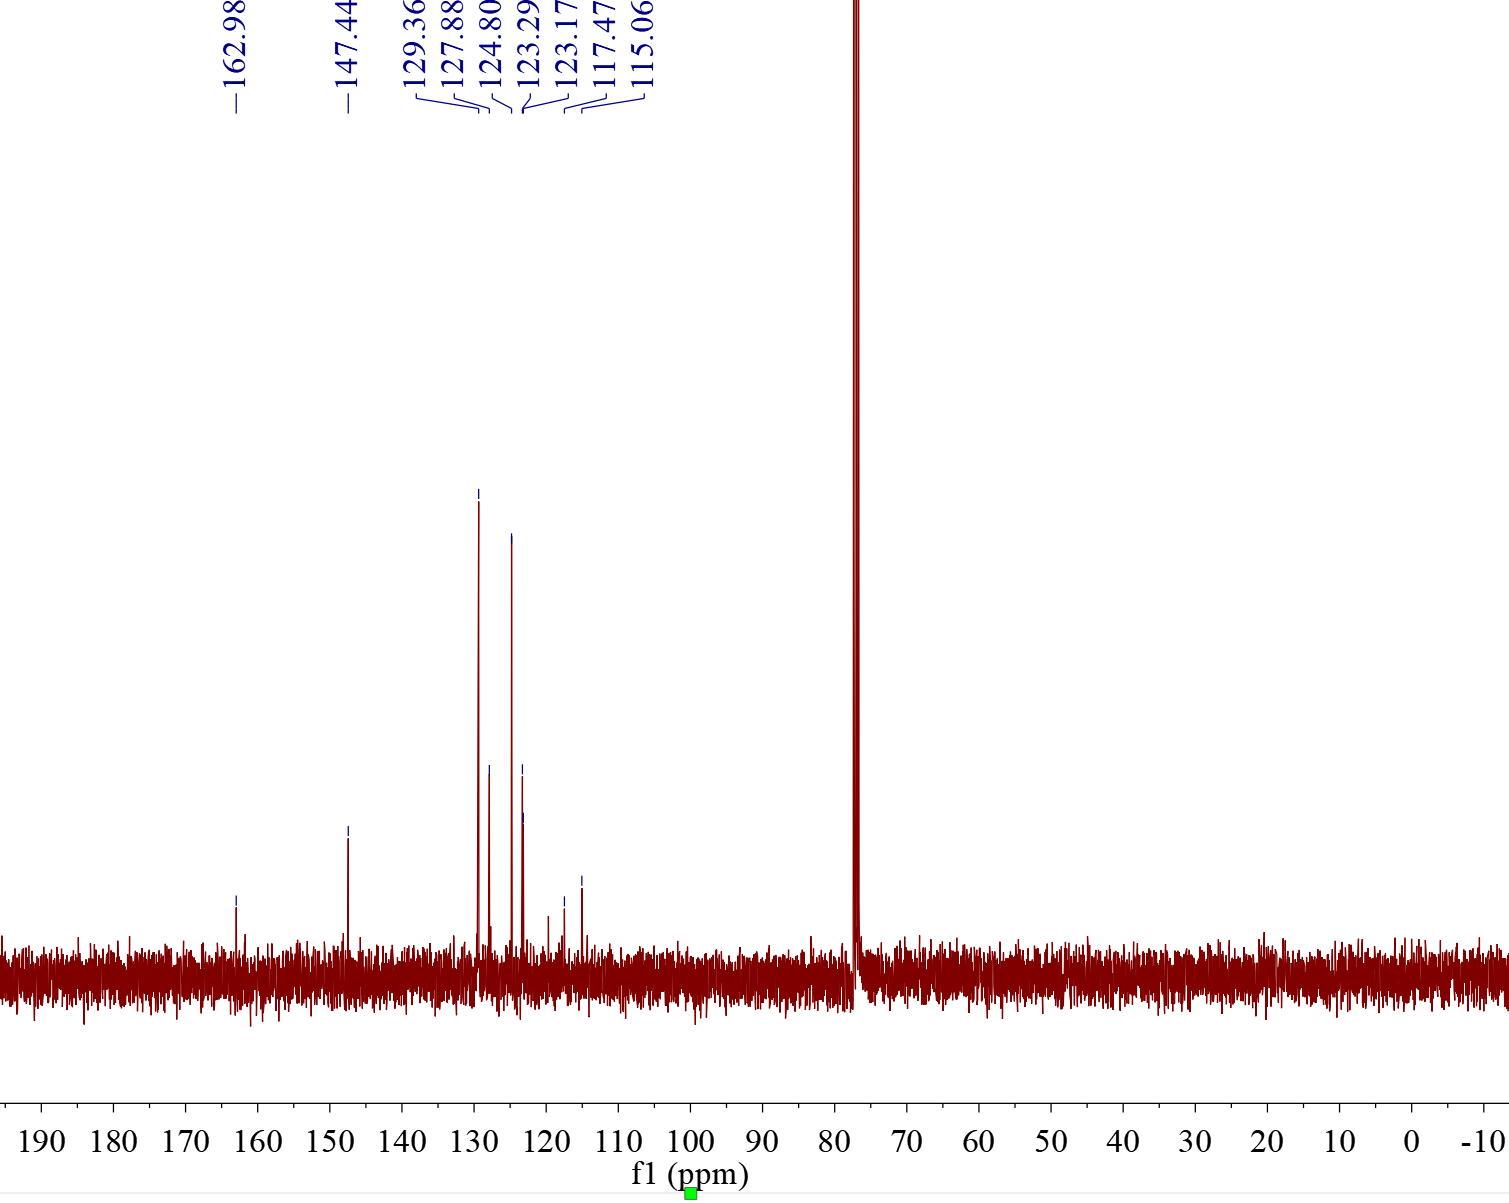


Fig. S2 13C NMR of compound **TPA-OPD**





Fig. S3 MALDI-TOF-MS spectrum of **TPA-OPD**.

Fig. S4 UV-Vis absorption spectra of **TPA-OPD** in different solvents (1.0×10-5 M)

Fig. S5The UV-Vis absorption spectra of **TPA-OPD** in DMSO-H₂O mixed solvent (1.0 × 10-⁵ M).





Fig. S6 MALDI-TOF-MS spectrum of **TPA-OPD +** Cu**2+**.

Fig. S7 **1**H NMR of compound **TPA-OPD** and **TPA-OPD + Cu2+**.


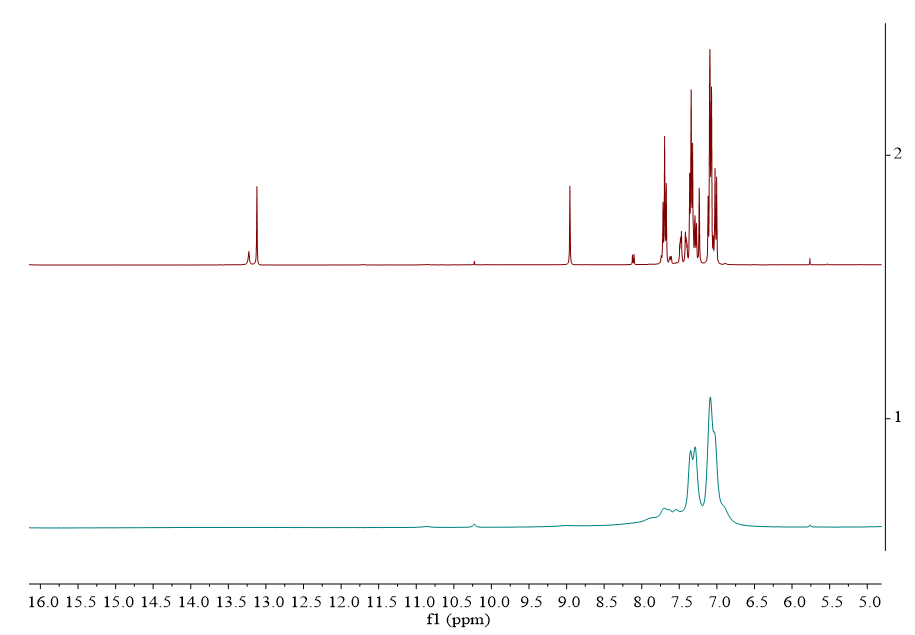


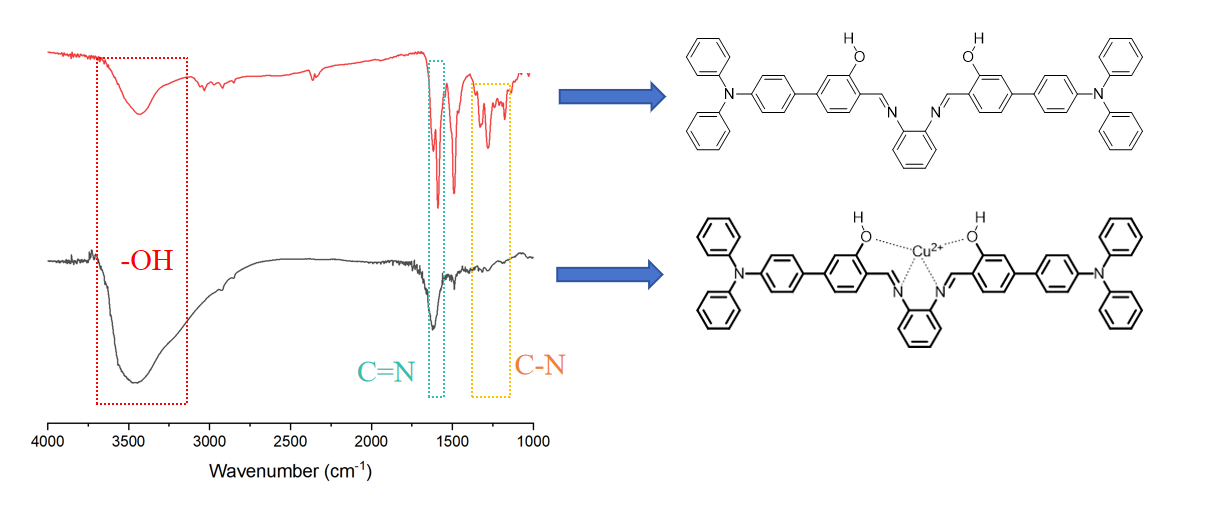


Fig. S8 FT-IR of compound **TPA-OPD** and **TPA-OPD + Cu2+**

Fig. S9 Schematic illustration of the chelation mechanism between **TPA-OPD** and Cu²⁺

**Table S1** Comparison of LOD value for sensing Cu2+.

| Sensor | Emission wavelength (nm) | LOD | Reference |
| --- | --- | --- | --- |
|  | 560 | 0.228 μM | Spectrochim. Acta A: Mol. Biomol. Spectrosc., 2024, 314, 124175. |
|  | 506 | 0.1 μM | Luminescence, 2024, 39(8), e4857. |
|  | 578/448 | 0.18 μM | Bioorganic Chemistry, 2023, 139, 106733. |
|  | 585 | 0.38 µM | Chemosensors, 2022, 10(10): 382-382 |
|  | 575 | 33.0 nM | Spectrochimica Acta Part A: Molecular and Biomolecular Spectroscopy, 2024, 325: 125154-125154 |
|  | 645 | 2.37 μM | Analytica Chimica Acta, 2023, 1276: 341602-341602 |
|  | 531 | 0.43 μM | Journal of Hazardous Materials, 2024, 467: 133735-133735 |
|  | 534 | 40.6 nM | Journal of Hazardous Materials, 2023, 465: 133192-133192 |
|  | 790/825 | 1.4 µM | Spectrochimica Acta Part A: Molecular and Biomolecular Spectroscopy, 2024, 325: 125115-125115 |
|  | 487 | 0.308 µM | Dyes and Pigments, 2022, 210: 110943-110943 |
|  | 434 | 0.429 µM | Spectrochimica Acta Part A: Molecular and Biomolecular Spectroscopy, 2024, 304: 123291-123291 |
|  | 455 | 0.77 µM | Journal of Photochemistry and Photobiology A: Chemistry, 2021, 415: 113318-113318 |
|  | 529 | 85 nM | New Journal of Chemistry, 2022, 46(47): 22525-22532 |
|  | 546 | 0.29 µM | Journal of Photochemistry and Photobiology A: Chemistry, 2021, 423: 113593-113593 |
|  | 548 | 20.47nM | Our work |
